# Supplementary material for: Inhibitor-Resistant Mutants Give Important Insights into Candida albicans ABC Transporter Cdr1 Substrate Specificity and Help Elucidate Efflux Pump Inhibition
Source: PubMed Central journal article supplement (PMC8765293; doi:10.1128/aac.01748-21), 2022-01-18
Supplement: aac.01748-21-s0001.pdf [file aac.01748-21-s0001.pdf]

## Supporting Information

### Supporting Tables

**Supporting Table S1.** Mutations detected in the milbemycin  $\alpha$ 25-resistant AD/CDR1

isolates.

| Isolate | CDR1 mutation | Cdr1 mutation | Location |
|---------|---------------|---------------|----------|
| R25-1   | G2137C        | A713P         | EL3      |
| R25-2   | G1561C        | G521R         | TMS1     |
| R25-3   | G1917C        | M639I         | TMS4     |
| R25-5   | C4064A        | T1355N        | TMS11    |
| R25-6   | G2137C        | A713P         | EL3      |
| R25-7   | G2137C        | A713P         | EL3      |
| R25-8   | G1917A        | M639I         | TMS4     |
| R25-9   | G1917A        | M639I         | TMS4     |

**Supporting Table S2.** Drug susceptibilities of AD/pABC3, AD/CDR1 and the strains

overexpressing Cdr1 mutants.

| Strain <sup>1</sup> | Azoles (mg/L) <sup>2</sup> |            |            |            |            |            |            | Other xenobiotics (mg/L) <sup>2</sup> |            |            |            |            |            |
|---------------------|----------------------------|------------|------------|------------|------------|------------|------------|---------------------------------------|------------|------------|------------|------------|------------|
|                     | FLC<br>306                 | CLT<br>345 | VRC<br>349 | MCZ<br>416 | KTC<br>531 | PSC<br>701 | ITC<br>706 | CER<br>223                            | CHX<br>281 | LaA<br>422 | R6G<br>479 | MON<br>681 | NIG<br>724 |
| pABC3               | 1.25                       | 0.002      | 0.016      | 0.008      | 0.008      | 0.016      | 0.031      | 0.25                                  | 0.016      | 0.016      | 0.5        | 0.031      | 0.063      |
| CDR1                | 640                        | 8          | 8          | 8          | 8          | 32         | 32         | 8                                     | 2          | 8          | 32         | 128        | 128        |
| G521R               | 160                        | 0.002      | 1          | 0.5        | 0.125      | 0.063      | 0.25       | 4                                     | 1          | 0.125      | 4          | 0.5        | 0.25       |
| M639I               | 640                        | 8          | 8          | 2          | 4          | 2          | 16         | 4                                     | 1          | 8          | 16         | 128        | 128        |
| A713P               | 320                        | 1          | 4          | 1          | 1          | 1          | 1          | 4                                     | 1          | 2          | 32         | 128        | 8          |
| T1355N              | 320                        | 4          | 8          | 2          | 4          | 2          | 16         | 4                                     | 2          | 2          | 32         | 128        | 128        |

<sup>1</sup> pABC3 = AD/pABC3 (negative control); CDR1 = AD/CDR1 (positive control); G521R = AD/CDR1-G521R; M639I = AD/CDR1-M639I; A713P = AD/CDR1-A713P; T1355N = AD/CDR1-T1355N.

<sup>2</sup> Cdr1 drug substrates are listed according to their molecular weight from lowest (left) to highest (right). Numbers underneath each compound are the molecular weights in Da.

**Supporting Table S3.** Estimated IC<sub>50</sub> values (μM)<sup>1</sup> for substrate inhibition of the ATPase activities of wt Cdr1 and the milbemycin α25 resistant G521R and A713P mutants.

|       | CLT  | KTC   | ITC               | R6G | MON  | NIG  |
|-------|------|-------|-------------------|-----|------|------|
| CDR1  | 30   | 13    | >32               | 32  | >256 | >256 |
| G521R | >100 | >1000 | >32               | 32  | none | >256 |
| A713P | 55   | 100   | none <sup>2</sup> | >64 | none | >256 |

<sup>1</sup> The estimated IC<sub>50</sub> values were calculated from Supporting Fig. S4. No substrate inhibited the ATPase activity by more than ~75%.

<sup>2</sup> None means even the highest substrate concentrations did not reduce the ATPase activity at all; values with larger than (>) signs indicate only partial inhibition of the ATPase activity (i.e. the ATPase activities could not be inhibited by 50% or more even at highest possible test concentrations).

**Supporting Table S4.** Mutations detected in the enniatin B resistant AD/CDR1 isolates.

| Isolate | <i>CDR1</i><br>mutation | Cdr1<br>mutation | Location |
|---------|-------------------------|------------------|----------|
| EN-1    | G1561C                  | G521R            | TMS1     |
| EN-2    | G1562T                  | G521V            | TMS1     |
| EN-3    | G1917A                  | M639I            | TMS4     |
| EN-4    | T1990A                  | L664I            | TMS5     |
| EN-5    | T1994C                  | L665S            | TMS5     |
| EN-6    | G2002A                  | V668I            | TMS5     |
| EN-7    | T3703G                  | F1235V           | TMS8     |
| EN-8    | G4068T                  | M1356I           | TMS11    |

**Supporting Table S5.** Mutations detected in the beauvericin resistant AD/CDR1 isolates.

| Isolate | <i>CDR1</i><br>mutation | Cdr1<br>mutation | Location |
|---------|-------------------------|------------------|----------|
| BE-1    | G1561A                  | G521S            | TMS1     |
| BE-2    | G1561T                  | G521C            | TMS1     |
| BE-3    | G1562T                  | G521V            | TMS1     |
| BE-4    | T2003A                  | V668D            | TMS5     |

**A**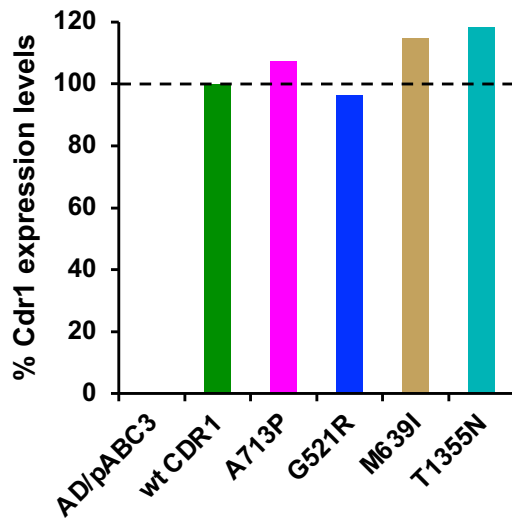**B**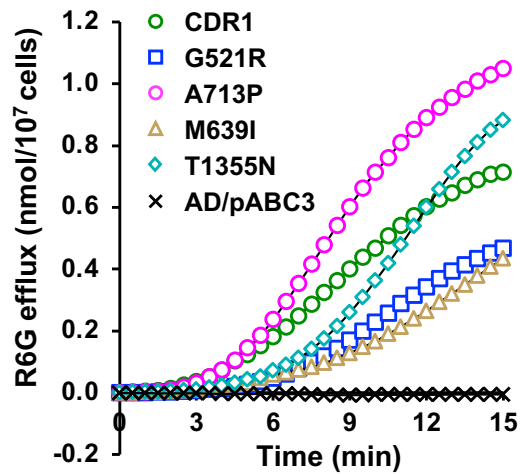

**Supporting Figure S1.** Expression levels and R6G efflux pump activities of wt Cdr1 and the four milbemycin  $\alpha$ 25 resistant Cdr1 variants. (A) The intensities of the coomassie-blue stained Cdr1 plasma membrane protein bands in Fig. 1B were quantified with ImageJ and normalized to wt Cdr1. (B) Graph of the time dependent R6G efflux pump activities of  $10^7$  of the indicated mid-log phase cells; cells were pre-loaded for 90 min with 15  $\mu$ M R6G in the presence of 2-deoxy-glucose and, after washing, the cells were resuspended in 50 mM HEPES buffer (pH 7.0) and R6G efflux was initiated by the addition of 5 mM glucose. No R6G efflux pump activity was detected for AD/pABC3 or for any of the Cdr1 overexpressing strains in the absence of glucose (data not shown). The results are the means of two independent experiments.

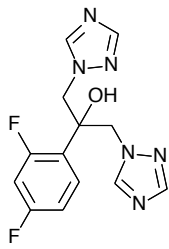

**FLC**  
(306.27)

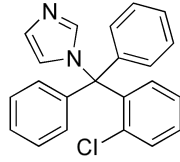

**CLT**  
(344.84)

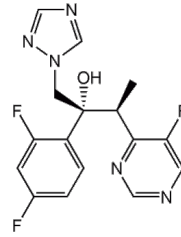

**VRC**  
(349.31)

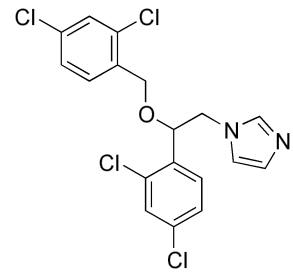

**MCZ**  
(416.13)

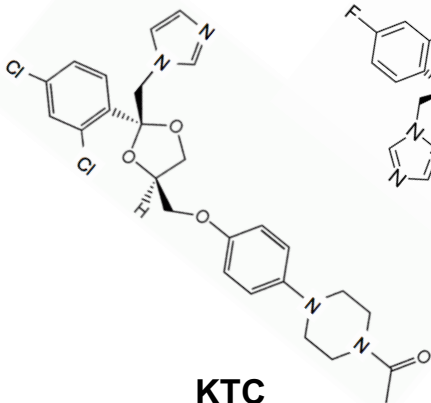

**KTC**  
(531.43)

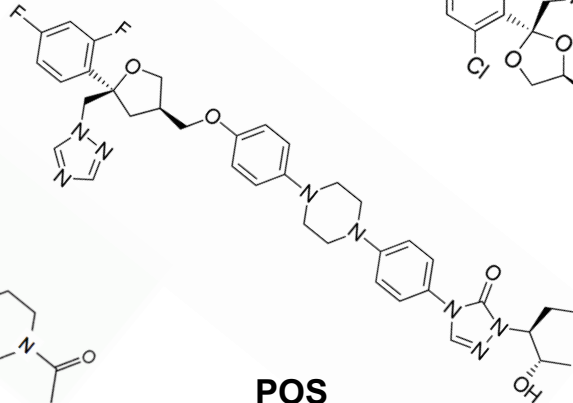

**POS**  
(700.78)

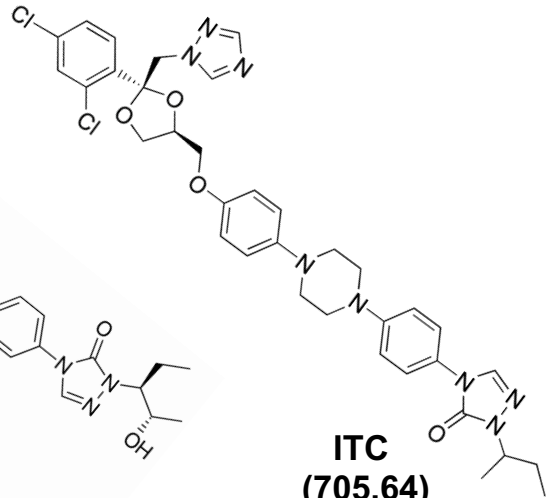

**ITC**  
(705.64)

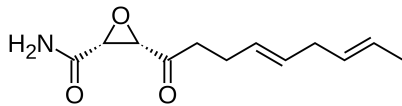

**CER**  
(223.27)

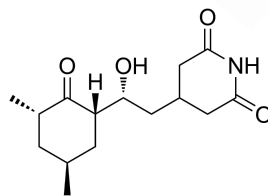

**CHX**  
(281.35)

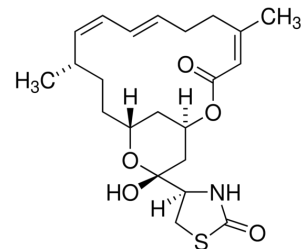

**LaA**  
(421.55)

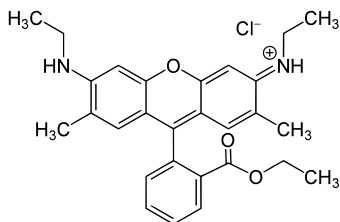

**R6G**  
(479.02)

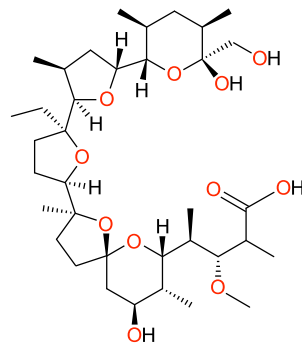

**MON**  
(680.87)

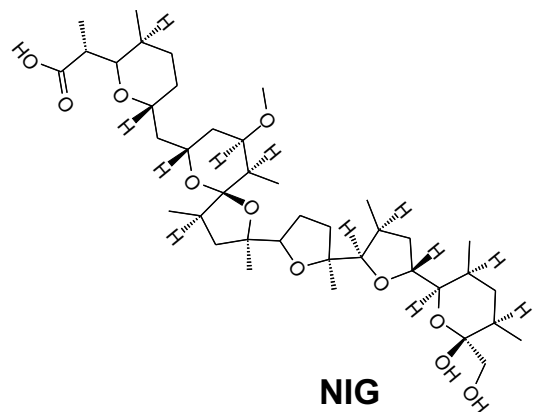

**NIG**  
(724.96)

**Supporting Figure S2.** Cdr1 substrates with their MWs in brackets (Da).

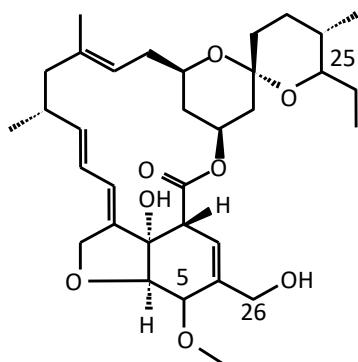

**milbemycin  $\alpha$ 25**  
(572.0)

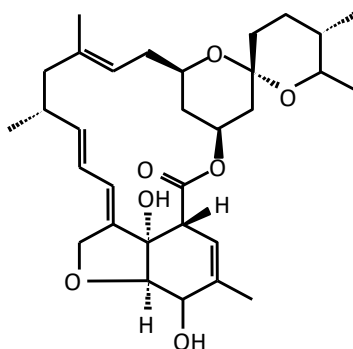

**milbemycin A3**  
(528.7)

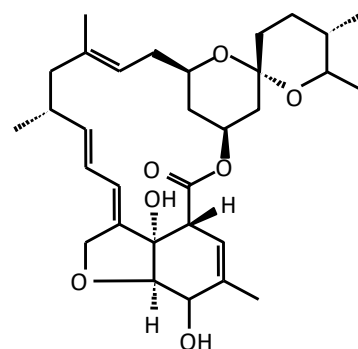

**milbemycin A4**  
(542.3)

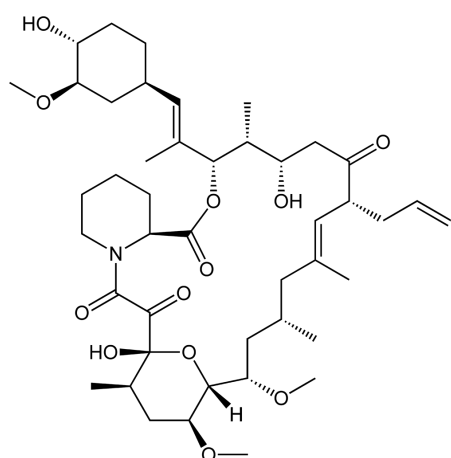

**FK506**  
(804.0)

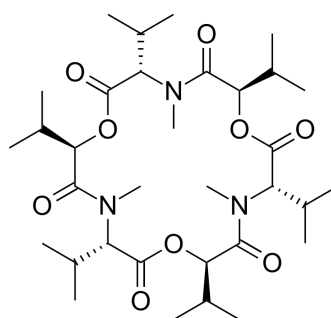

**enniatin B**  
(639.8)

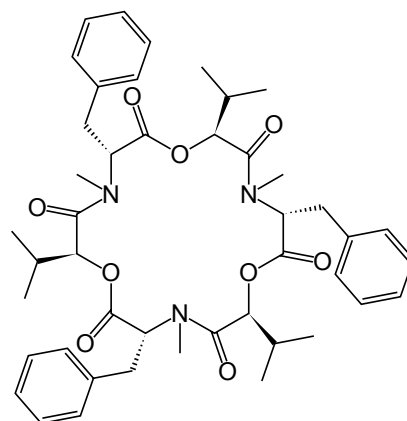

**beauvericin**  
(784.0)

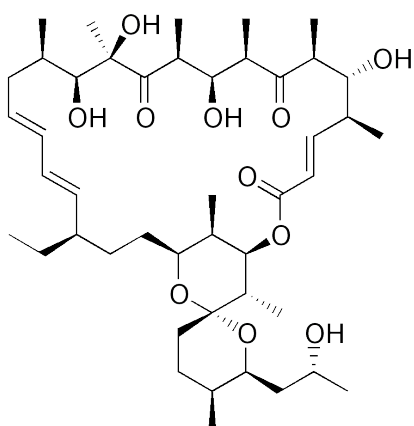

**oligomycin**  
(791)

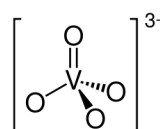

**orthovanadate**  
(114.9)

**Supporting Figure S3.** Cdr1 efflux pump inhibitors with their MWs in brackets (Da).

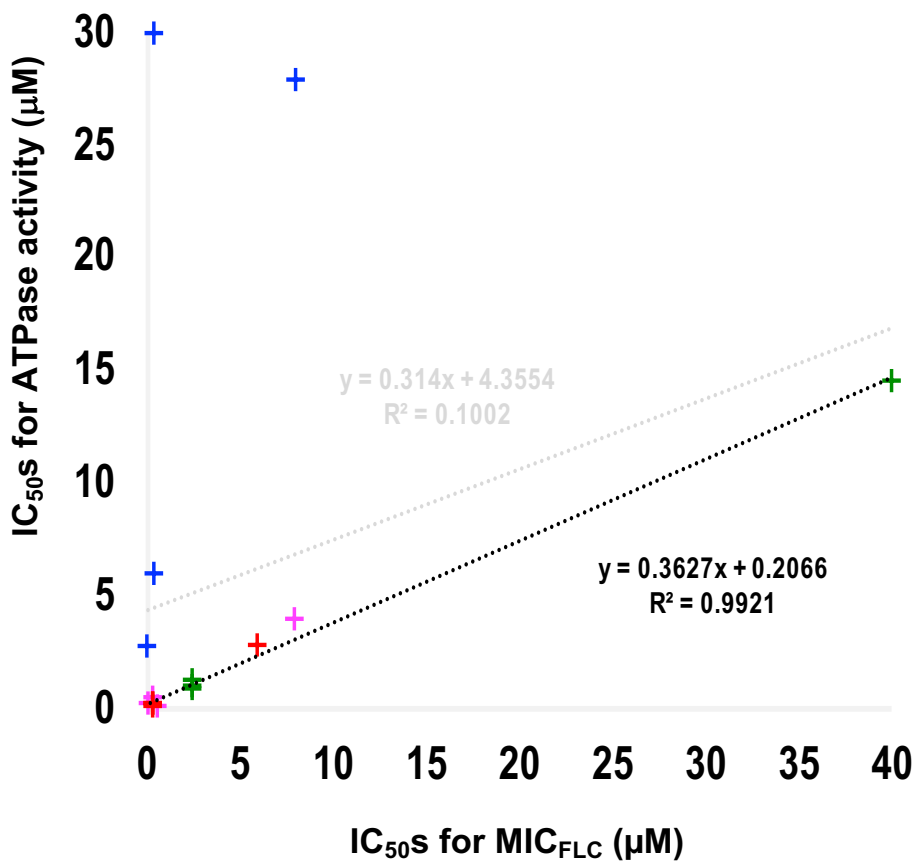

**Supporting Figure S4.** There was a good correlation ( $R^2 = 0.99$ ; black dotted trendline) between the  $IC_{50}$  values for the inhibition of the ATPase activities of isolated plasma membranes (y-axis) and the FLC efflux pump inhibition of intact cells (x-axis) by FK506 (green), enniatin B (magenta) and beauvericin (red) in wt Cdr1, G521R, M639I and T1355N overexpressing cells, but only if the data for milbemycin  $\alpha$ 25 (blue) were excluded from the calculations (grey dotted trendline;  $R^2 = 0.10$ ). The data were extracted from Table 4.

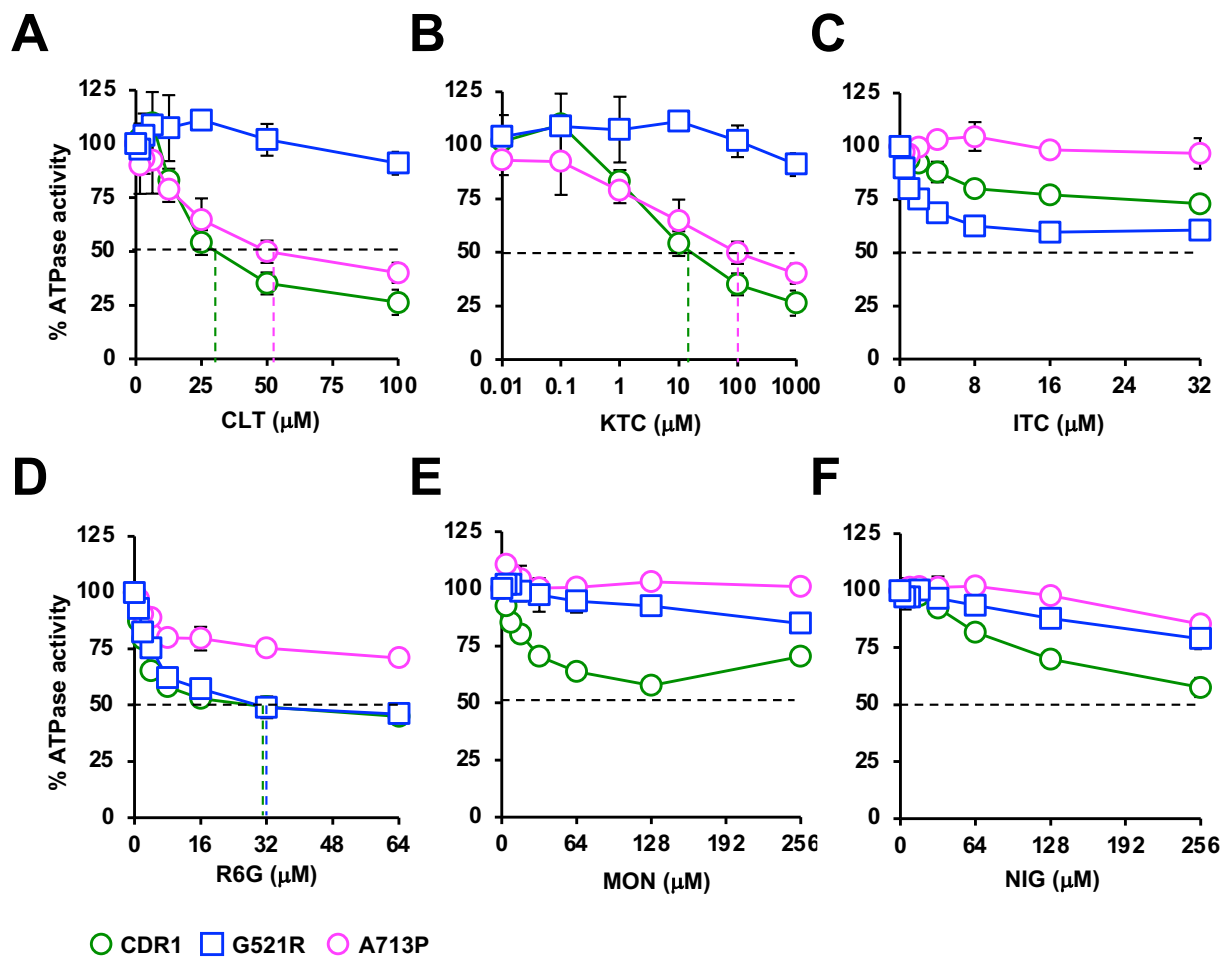

**Supporting Figure S5.** Effect of substrates on the ATPase activities of wt Cdr1 and the milbemycin  $\alpha 25$ -resistant mutants G521R and A713P. The mean ATPase activities of three independent experiments ( $\pm$  SD) were expressed as the percentage of the uninhibited ATPase activities. The ATPase activities of wt Cdr1 (green circles), Cdr1-G521R (blue squares), and Cdr1-A713P (pink circles) in response to increasing concentrations of CLT (A), KTC (B), ITC (C), R6G (D), MON (E) and NIG (F) are shown. Dashed horizontal lines indicate 50% inhibition and coloured vertical dashed lines the  $\text{IC}_{50}$  values for the corresponding substrate.

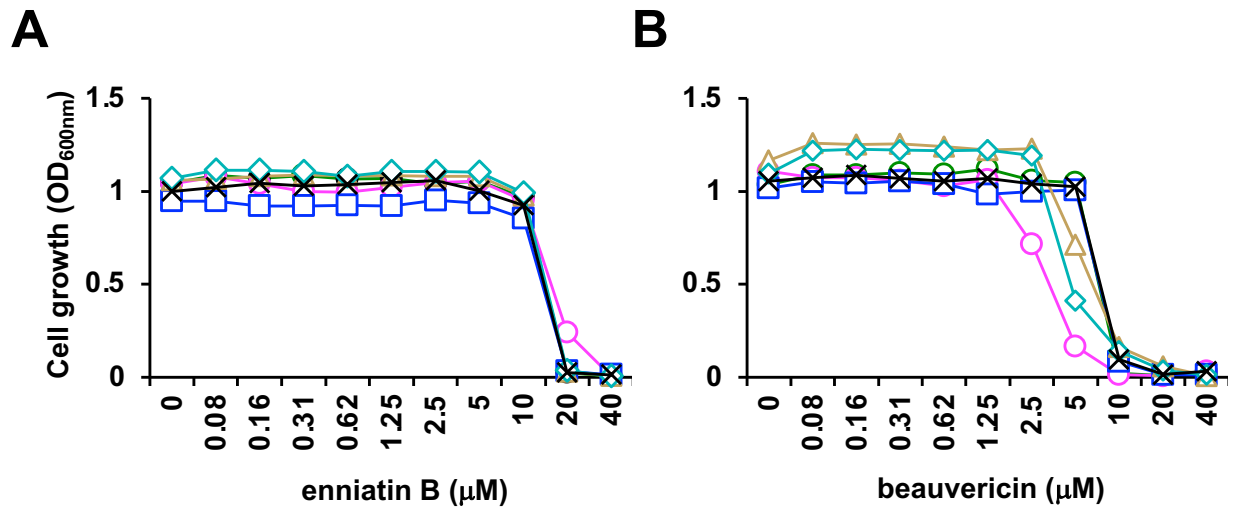

**Supporting Figure S6.** Pump inhibitor susceptibilities of the sensitive control strain AD/pABC3 and AD1-8u<sup>-</sup> cells overexpressing wt Cdr1 and the milbemycin  $\alpha$ 25 resistant Cdr1 mutants. The enniatin B and beauvericin susceptibilities of cells grown in CSM medium adjusted to pH 7.0 were determined after 2 days of incubation with shaking at 150 rpm at 30°C. (A) Enniatin B susceptibilities and (B) beauvericin susceptibilities. x, AD/pABC3; ○, CDR1; ○, A713P; □, G521R; △, M639I; ◇, T1355N.
